# Supplementary material
Source: HighWire-hosted journal article supplement (https://erj.ersjournals.com/content/58/4/2101169)
Supplement: inline-supplementary-material-1 [file inline-supplementary-material-1.pdf]

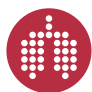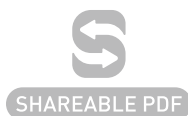

# Human experimental models: seeking to enhance multiscale research in sleep apnoea

Ramon Farré<sup>1,2,3</sup>, David Gozal <sup>4</sup> and Isaac Almendros <sup>1,2,3</sup>

<sup>1</sup>Unitat de Biofísica i Bioenginyeria, Facultat de Medicina i Ciències de la Salut, Universitat de Barcelona, Barcelona, Spain. <sup>2</sup>CIBER de Enfermedades Respiratorias, Madrid, Spain. <sup>3</sup>Institut Investigacions Biomediques August Pi Sunyer, Barcelona, Spain. <sup>4</sup>Dept of Child Health, The University of Missouri School of Medicine, Columbia, MO, USA.

Corresponding author: Ramon Farré ([rfarre@ub.edu](mailto:rfarre@ub.edu))

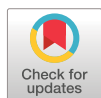

Shareable abstract (@ERSpublications)

**Experimental models in healthy subjects and patients are useful to complement cell culture and animal research in studying the pathophysiology of obstructive sleep apnoea consequences**

<https://bit.ly/3nKPFsl>

**Cite this article as:** Farré R, Gozal D, Almendros I. Human experimental models: seeking to enhance multiscale research in sleep apnoea. *Eur Respir J* 2021; 58: 2101169 [DOI: 10.1183/13993003.01169-2021].

This single-page version can be shared freely online.

Copyright ©The authors 2021. For reproduction rights and permissions contact [permissions@ersnet.org](mailto:permissions@ersnet.org)

Received: 23 April 2021  
Accepted: 26 April 2021

Obstructive sleep apnoea (OSA) is a prevalent respiratory disease associated with important comorbidities, such as obesity, metabolic syndrome, cancer, and cognitive and cardiovascular alterations [1, 2]. Unfortunately, determining cause–effect relationships that definitively link OSA to these comorbidities and establishing whether OSA treatment may reduce the comorbidity risk have emerged as conundrums that have proven very difficult to disentangle in spite of major research efforts [3–5]. These difficulties have emerged as particularly relevant when focusing on the potential relationship between OSA and cardiocirculatory diseases [6, 7]. Indeed, a simple search (12 April, 2021) in PubMed for the past 12 months using the tags “sleep apnoea AND cardiovascular” (563 publications) and “sleep apnoea” (3300 publications) indicates that 17% of all the research in the field of OSA is focused on its putative relationship with cardiovascular dysfunction.
